1 **Running title:**

2 *Coxiella burnetii* infection in veterinary students

3 **Keywords:**

4 Q fever, *Coxiella burnetii*, Seroepidemiologic Studies, Seroconversion, Veterinarians,  
5 Students, Netherlands

6 **Title:**

7 High *Coxiella burnetii* seroconversion rate in veterinary students, the Netherlands, 2006-2010

8 **Authors:**

9 Marit M.A. de Lange, PhD; Wim van der Hoek, MD; Peter M. Schneeberger, MD; Arno  
10 Swart, PhD; Dick J. J. Heederik, Prof; Barbara Schimmer, MD; Inge M. Wouters, PhD

11 **Author affiliations:**

12 National Institute for Public Health and the Environment, Bilthoven, the Netherlands (M. de  
13 Lange, W. van der Hoek, A. Swart, B. Schimmer)

14 Jeroen Bosch Hospital, 's-Hertogenbosch, the Netherlands (P. Schneeberger)

15 Institute for Risk Assessment Sciences (IRAS), Utrecht University, Utrecht, the Netherlands  
16 (D. Heederik, I. Wouters)

17 **Corresponding author:**

18 Marit M.A. de Lange, PhD, epidemiologist, National Institute for Public Health and the  
19 Environment, Centre for Infectious Disease Control Netherlands, Antonie van  
20 Leeuwenhoeklaan 9, 3721 MA, Bilthoven, the Netherlands. E-mail: [marit.de.lange@rivm.nl](mailto:marit.de.lange@rivm.nl)  
21 Tel: +31 30 274 34 61, Fax: +31 30 274 44 09

22 **Abstract – 49 words**

23 We examined seroconversion rates by measuring IgG antibodies against *Coxiella burnetii*  
24 among two cohorts of veterinary students. During follow-up of 118 seronegative veterinary  
25 students, 23 students seroconverted. Although the clinical significance of the presence of  
26 antibodies is unknown, students should be informed about the potential risks of Q fever.

27 **Text - 1191 words**

28 Q fever is caused by the bacterium *Coxiella burnetii* and can present as acute or chronic  
29 illness. However, around 60% of infected people remain asymptomatic (1). In particular,  
30 livestock veterinarians are at increased risk of a *C. burnetii* infection (2). Previously, a high  
31 seroprevalence, range 11-19%, among veterinary medicine students was reported (3-5).  
32 However, the incidence of Q fever and associated risk factors during veterinary training are  
33 still unknown. Therefore, we performed a longitudinal study in veterinary students in the  
34 Netherlands following incoming, seronegative veterinary students during a maximum of 4-  
35 year study period and registered potential study and non-study related associated factors for  
36 seroconversion.

37 **The study**

38 Veterinary medicine students who started in 2006 or 2008 (around 225 each year) at the  
39 Faculty of Veterinary Medicine of Utrecht University (FVMUU) were eligible for inclusion.  
40 This faculty provides the only veterinary medicine program in the Netherlands. Recruitment  
41 methods included informational class presentations and a mailed brochure. The Medical  
42 Ethical Commission of the University Medical Centre Utrecht approved the study protocol  
43 (no. 06/169). After obtaining written informed consent, a blood sample was collected at study  
44 start and participants completed a baseline questionnaire. From participants who started at the  
45 FVMUU in 2006 (cohort 2006), up to two additional blood samples were collected and  
46 follow-up questionnaires completed in 2008 and 2010. Students who started in 2008 (cohort  
47 2008) provided only one follow-up blood sample and follow-up questionnaire, in 2010. Both  
48 the baseline and follow-up questionnaires included questions about animal contact, living  
49 situation, personal health situation, and smoking habits before and during the study period.  
50 The follow-up questionnaires also included questions about the study choices and study  
51 related courses.

52 Serum samples were tested for IgG antibodies against phase I and II of *C. burnetii*, using an  
53 indirect immunofluorescence assay (IFA) as previously described (3). Those with IgG phase I  
54 or II antibodies  $\geq 1:32$  were classified as *C. burnetii* seropositive. Seroconversion was defined  
55 as a participant who was IgG seronegative at baseline and seropositive in one of the follow-up  
56 samples. Participants with an IgG phase I titer of  $\geq 1:1024$  had a serological indication for a  
57 chronic Q fever infection (6).

58 All data were analyzed with SAS, version 9.4 (SAS Institute Inc., USA). First, differences in  
59 demographics and past animal exposure characteristics between seropositive and seronegative  
60 participants at baseline were determined with a Fisher exact test (numerical characteristics) or  
61 Kruskal Wallis test (categorical characteristics). To estimate seroconversion rate and possible  
62 associated factors for seroconversion during follow-up, data from seronegative participants  
63 with at least one follow-up sample were used. The univariable logistic regression analyses  
64 were performed with generalized estimating equations (GEE) models with an exchangeable  
65 correlation matrix. These models were used to take into account correlations between the  
66 repeated measurements of serostatus within the same subject (7). Participants' data were  
67 censored for the times after they were tested *C. burnetii* seropositive. The data from the two  
68 cohorts were analyzed together, because the data sets were too small to analyze them  
69 separately. The FVMUU starting year (cohort) and the number of years after the study start  
70 were always included as covariates in the model. Investigated characteristics were animal-  
71 related exposure outside the study, living situation, smoking habits, study duration, cohort,  
72 and chosen study direction; in total, we investigated 20 characteristics. Associations were  
73 considered significant at confidence level of  $\alpha < 0.05$ . All univariable associated  
74 characteristics were highly interrelated ( $P < 0.05$  in Fisher exact test). Therefore, multivariable  
75 logistic GEE analysis was not possible.

76 At the beginning of their veterinary training 447 students were invited to participate in the  
77 study of which 131 participated, of whom 13 (10%) were *C. burnetii* IgG seropositive at  
78 baseline. Students who were seropositive at baseline were more likely to have ever lived on a  
79 farm (Table 1). Similarly, they had more contact with farm animals than students who were  
80 seronegative at baseline, but the difference was only statistically significant for contact with  
81 cows and poultry. No other significant differences were found between *C. burnetii*  
82 seronegative and seropositive students at baseline (Table 1).

83 Of the 118 seronegative participants at baseline, 78 started their study in 2006 and 40 in 2008  
84 (Figure). Of those students, 23 seroconverted during the follow-up period of 362 person-  
85 years, which results in an incidence of 0.06 per person-year. None of the seroconverted  
86 participants reported that their general practitioner or medical specialist diagnosed them with  
87 acute Q fever. Additionally, none of the participants had a serological indication for a chronic  
88 infection.

89 Of the 20 investigated characteristics, “living on a sheep or goat farm”, “having contact with  
90 sheep outside the study”, and “working with hay, straw, silage grass or animal feed” during  
91 their study period outside the FVMUU increased the odds of seroconversion ( $p < 0.05$ ), in  
92 analyses adjusted for time since start study and cohort. Performing animal nursing on the farm  
93 where they lived tended to increase seroconversion ( $p = 0.07$ ) (Table 2).

#### 94 **Conclusion**

95 In this longitudinal serological study among veterinary students, we found a *C. burnetii*  
96 incidence of 0.06 per person-year. None of the seroconverted participants self-reported that  
97 they were diagnosed with acute Q fever, suggesting all cases were mild or asymptomatic.  
98 Additionally, none of the participants had a serological indication for a chronic infection. In  
99 veterinarians, which is the studied group in an advanced stage of their career, a high IgG

100 phase I seroprevalence was found. It remains debatable whether presence of antibodies in  
101 occupationally exposed people with frequent boosting is of clinical significance (8).

102 Three non-study factors were associated with increased seroconversion. Proximity to  
103 (aborting) small ruminants, such as goats and sheep, has previously been reported as  
104 important risk factor in an outbreak in the Netherlands (9). It is known that veterinary students  
105 have a high prevalence of animal contacts outside the study (10). Next, contact with hay,  
106 straw, silage grass or animal feed, is a known risk factor for human Q fever (11). A major  
107 acute Q fever outbreak occurred in the Netherlands from 2007 to 2010 (12), as a result of  
108 which some students may also have contracted the infection. Although increased  
109 seroprevalence of Q fever in veterinary students prior to the outbreak has been reported (3).

110 We were not able to investigate study-related potential risk factors, such as followed courses  
111 due to two reasons. First, the curriculum changed during the investigation, so participants  
112 from the 2006 and 2008 cohort followed different courses, causing a low power in the  
113 analysis. Second, per cohort of students, there was little variation in followed courses.

114 Seroconversion incidence data is scarce. Of 246 seronegative culling workers 36 became IgG  
115 positive during the half year follow-up period, corresponding to an incidence of 0.29 per  
116 person-year (13), which is higher than the incidence in veterinary students (0.06 per person-  
117 year).

118 A nationally funded Q fever vaccination program for occupationally exposed people was  
119 introduced in Australia in 2002 (14). At this moment, the Health Council of the Netherlands  
120 does not advice to vaccinate occupationally exposed people (15). The results of this study  
121 should be taken into account when reconsidering this advice.

122 In conclusion, we found a considerable *C. burnetii* seroconversion rate among veterinary  
123 students. Although the clinical significance of the presence of antibodies is unknown, it is

124 advisable to inform students at the beginning of the study about the potential risks of acute  
125 and chronic Q fever.

### 126 **Acknowledgments**

127 We would like to express our gratitude to all participants of the study. Many thanks to co-  
128 workers at the Institute for Risk Assessment Sciences involved in recruitment of the  
129 participants and serum sample collection (Lot Bannink, Manon Bogaerts, Isabella van  
130 Schothorst, Esmeralda Krop, Siegfried de Wind, Jack Spithoven, Marieke Oldenwening,  
131 Lidwien Smit, Haitske Gravenland and Bernadette Aalders) Next, we would like to thank all  
132 laboratory technicians of the serology unit of the Department of Medical Microbiology and  
133 Infection Control of the Jeroen Bosch Hospital for their work in analyzing serum samples.  
134 Last, we would like to thank Roel Coutinho of the Julius Center UMC Utrecht for critically  
135 reviewing the manuscript. The authors have no support or funding to report.

### 136 **Author Bio**

137 Dr. de Lange is epidemiologist at the National Institute for Public Health and the  
138 Environment. She has conducted her PhD research on Q fever. Other research interests are  
139 respiratory infections, such as influenza and RSV.

140 **Figures**

|                        | 2006        | 2008        | 2010        |
|------------------------|-------------|-------------|-------------|
| <b>Cohort 2006 N</b>   | 78          | 77          | 73          |
| Questionnaire no/N (%) | 77/78 (99)  | 77/77 (100) | 71/73 (97)  |
| Blood no/N (%)         | 78/78 (100) | 72/77 (94)  | 63/73 (86)  |
| Seropositive no/N (%)  | 0/78 (0)    | 11/77 (15)  | 17/63 (27)* |
| <b>Cohort 2008 N</b>   |             | 40          | 40          |
| Questionnaire no/N (%) |             | 39/40 (98)  | 38/40 (95)  |
| Blood no/N (%)         |             | 40/40 (100) | 40/40 (100) |
| Seropositive no/N (%)  |             | 0/40 (0)    | 6/40 (15)   |

141

142 **Figure.** Follow-up timeline illustrating the number and percentages of seronegative participants at  
 143 baseline, per follow-up moment. Abbreviations: no = the number in the corresponding group, N = total  
 144 number of patients.

145 \* The 17 seropositive students in 2010 include the 11 seropositive students who already seroconverted  
 146 between 2006 and 2008, who were censured from risk factor analysis in 2010.



147 **Tables**

148 **Table 1.** Baseline questionnaire characteristics of two cohorts of veterinary students (cohort 1

149 started in 2006, cohort 2 started in 2008) at the Faculty of Veterinary Medicine of Utrecht

150 University, the Netherlands.

| Characteristic                                   | Seronegative participants<br>at baseline in 2006 or<br>2008 N=118*<br>Median or no/N (%) | Seropositive<br>participants at baseline<br>in 2006 or 2008 N=13<br>Median or no/N (%) | p value |
|--------------------------------------------------|------------------------------------------------------------------------------------------|----------------------------------------------------------------------------------------|---------|
| Age (years)                                      | 19                                                                                       | 18                                                                                     | 0.24    |
| BMI                                              | 21                                                                                       | 21                                                                                     | 0.87    |
| Gender                                           |                                                                                          |                                                                                        |         |
| Male                                             | 18/116 (16)                                                                              | 3/13 (23)                                                                              | 0.44    |
| Female                                           | 98/116 (84)                                                                              | 10/13 (77)                                                                             |         |
| Smoking                                          |                                                                                          |                                                                                        |         |
| No smoking                                       | 109/115 (94)                                                                             | 13/13 (100)                                                                            | 1.00    |
| Past smoker                                      | 3/115 (3)                                                                                | 0/13 (0)                                                                               |         |
| Current smoker                                   | 3/115 (3)                                                                                | 0/13 (0)                                                                               |         |
| Grew up in a                                     |                                                                                          |                                                                                        |         |
| Village (<15,000 inhabitants)                    | 44/116 (38)                                                                              | 7/13 (54)                                                                              | 0.45    |
| Town (15,000-80,000 inhabitants)                 | 47/116 (40)                                                                              | 5/13 (38)                                                                              |         |
| City (>80,000 inhabitants)                       | 25/116 (22)                                                                              | 1/13 (8)                                                                               |         |
| Ever lived on a farm                             |                                                                                          |                                                                                        |         |
| Yes                                              | 11/116 (9)                                                                               | 7/13 (54)                                                                              | <0.01   |
| No                                               | 105/116 (91)                                                                             | 6/13 (46)                                                                              |         |
| Regular contact with cows before start of FVMUU  |                                                                                          |                                                                                        |         |
| Yes                                              | 19/116 (16)                                                                              | 9/13 (69)                                                                              | <0.01   |
| No                                               | 97/116 (84)                                                                              | 4/13 (31)                                                                              |         |
| Regular contact with goats before start of FVMUU |                                                                                          |                                                                                        |         |
| Yes                                              | 18/116 (16)                                                                              | 5/13 (38)                                                                              | 0.06    |

|                                                    |              |           |      |
|----------------------------------------------------|--------------|-----------|------|
| No                                                 | 98/116 (84)  | 8/13 (62) |      |
| Regular contact with sheep before start of FVMUU   |              |           |      |
| Yes                                                | 20/116 (17)  | 5/13 (38) | 0.13 |
| No                                                 | 96/116 (83)  | 8/13 (62) |      |
| Regular contact with poultry before start of FVMUU |              |           | 0.02 |
| Yes                                                | 31/116 (27)  | 8/13 (62) |      |
| No                                                 | 85/116 (73)  | 5/13 (38) |      |
| Regular contact with horses before start of FVMUU  |              |           | 1.00 |
| Yes                                                | 65/116 (56)  | 7/13 (54) |      |
| No                                                 | 51/116 (44)  | 6/13 (46) |      |
| Regular contact with pigs before start of FVMUU    |              |           | 0.07 |
| Yes                                                | 13/116 (11)  | 4/13 (31) |      |
| No                                                 | 103/116 (89) | 9/13 (69) |      |

151 Abbreviations: n=Number, N=Total number, BMI=Body Mass Index, FVMUU = Faculty of Veterinary

152 Medicine of Utrecht University, NA=Not available.

153 \* Two seronegative participants at baseline did not fill out a questionnaire.

154 **Table 2.** Characteristics from follow-up questionnaire in association with Q fever  
 155 seroconversion among 118 veterinary students who were seronegative at start of their study in  
 156 2006 or 2008, the Netherlands

| Characteristic                                 | OR (95% CI)    | p value |
|------------------------------------------------|----------------|---------|
| Age (years)                                    |                |         |
| ≤ 20                                           | Reference      |         |
| 21                                             | 0.9 (0.2-3.5)  | 0.85    |
| ≥ 22                                           | 1.3 (0.4-4.2)  | 0.69    |
| Gender                                         |                |         |
| Male                                           | Reference      |         |
| Female                                         | 0.7 (0.2-2.3)  | 0.53    |
| Regularly exposed to cigarette smoke           |                |         |
| Yes                                            | 1.1 (0.4-2.8)  | 0.81    |
| No                                             | Reference      |         |
| Living on a farm with cows                     |                |         |
| Yes                                            | ND*            |         |
| No                                             |                |         |
| Living on a farm with sheep or goats           |                |         |
| Yes                                            | 6.2 (1.4-28.1) | 0.02    |
| No                                             | Reference      |         |
| Living on a farm with pigs                     |                |         |
| Yes                                            | ND*            |         |
| No                                             |                |         |
| Living on a farm with chicken                  |                |         |
| Yes                                            | 3.0 (0.3-35.0) | 0.39    |
| No                                             | Reference      |         |
| Having regular contact with cows outside study |                |         |
| Yes                                            | 0.3 (0.1-2.7)  | 0.31    |
| No                                             | Reference      |         |

|                                                       |                |       |
|-------------------------------------------------------|----------------|-------|
| Having regular contact with goats outside study       |                |       |
| Yes                                                   | 0.6 (0.1-3.8)  | 0.56  |
| No                                                    | Reference      |       |
| Having regular contact with horses outside study      |                |       |
| Yes                                                   | 0.7 (0.3-1.7)  | 0.40  |
| No                                                    | Reference      |       |
| Having regular contact with pigs outside study        |                |       |
| Yes                                                   | ND*            |       |
| No                                                    |                |       |
| Having regular contact with chicken outside study     |                |       |
| Yes                                                   | 0.5 (0.1-3.8)  | 0.50  |
| No                                                    | Reference      |       |
| Having regular contact with sheep outside study       |                |       |
| Yes                                                   | 4.4 (1.2-16.7) | 0.03  |
| No                                                    | Reference      |       |
| Performing animal nursing on the farm where you lived |                |       |
| Yes                                                   | 3.6 (0.9-14.3) | 0.07  |
| No                                                    | Reference      |       |
| Working with straw/hay on the farm where you lived    |                |       |
| Yes                                                   | 6.4 (1.6-26.1) | <0.01 |
| No                                                    | Reference      |       |
| Working with fertilizers on the farm where you lived  |                |       |
| Yes                                                   | 3.2 (0.5-19.6) | 0.21  |
| No                                                    | Reference      |       |
| Performing plant nursing on the farm where you lived  |                |       |
| Yes                                                   | 3.1 (0.3-33.5) | 0.35  |
| No                                                    | Reference      |       |
| Number of years after start study†                    |                |       |
| Two                                                   | Reference      |       |
| Four                                                  | 1.0 (0.3-2.9)  | 0.96  |

|                                         |               |      |
|-----------------------------------------|---------------|------|
| Cohort‡                                 |               |      |
| 2006                                    | Reference     |      |
| 2008                                    | 0.7 (0.3-2.0) | 0.56 |
| Chosen specialization during study      |               |      |
| Individually kept animals               | Reference     |      |
| Veterinary public health / farm animals | 1.6 (0.5-5.0) | 0.38 |

157 Abbreviations: CI=confidence interval, ND=Not determined, OR=Odds Ratio.

158 \*Not to be determined due to low numbers.

159 †Only adjusted for cohort.

160 ‡Only adjusted for number of years after the study.

161 **References**

- 162 1. Maurin M, Raoult D. Q fever. Clin Microbiol Rev. 1999;12(4):518-53.
- 163 2. Van den Brom R, Schimmer B, Schneeberger PM, Swart WA, van der Hoek W,  
164 Vellema P. Seroepidemiological survey for *Coxiella burnetii* antibodies and associated risk  
165 factors in Dutch livestock veterinarians. PLoS One. 2013;8(1):e54021.
- 166 3. de Rooij MM, Schimmer B, Versteeg B, Schneeberger P, Berends BR, Heederik D, et  
167 al. Risk factors of *Coxiella burnetii* (Q fever) seropositivity in veterinary medicine students.  
168 PLoS One. 2012;7(2):e32108.
- 169 4. Meadows SL, Jones-Bitton A, McEwen SA, Jansen J, Patel SN, Filejski C, et al.  
170 Prevalence and risk factors for *Coxiella burnetii* seropositivity in small ruminant veterinarians  
171 and veterinary students in Ontario, Canada. Can Vet J. 2017;58(4):397-9.
- 172 5. Valencia MC, Rodriguez CO, Punet OG, de Blas Giral I. Q fever seroprevalence and  
173 associated risk factors among students from the Veterinary School of Zaragoza, Spain. Eur J  
174 Epidemiol. 2000;16(5):469-76.
- 175 6. Wegdam-Blans MC, Kampschreur LM, Delsing CE, Bleeker-Rovers CP, Sprong T,  
176 van Kasteren ME, et al. Chronic Q fever: review of the literature and a proposal of new  
177 diagnostic criteria. J Infect. 2012;64(3):247-59.
- 178 7. Liang K, Zeger SL. Longitudinal data analysis using generalized linear models.  
179 Biometrika. 1986;73(1):13-22.
- 180 8. Wielders CC, Boerman AW, Schimmer B, van den Brom R, Notermans DW, van der  
181 Hoek W, et al. Persistent high IgG phase I antibody levels against *Coxiella burnetii* among  
182 veterinarians compared to patients previously diagnosed with acute Q fever after three years  
183 of follow-up. PLoS One. 2015;10(1):e0116937.
- 184 9. Roest HI, Tilburg JJ, van der Hoek W, Vellema P, van Zijderveld FG, Klaassen CH, et  
185 al. The Q fever epidemic in The Netherlands: history, onset, response and reflection.  
186 Epidemiol Infect. 2011;139(1):1-12.

- 187 10. Samadi S, Spithoven J, Jamshidifard AR, Berends BR, Lipman L, Heederik DJ, et al.  
188 Allergy among veterinary medicine students in The Netherlands. *Occup Environ Med*.  
189 2012;69(1):48-55.
- 190 11. Rustscheff S, Norlander L, Macellaro A, Sjostedt A, Vene S, Carlsson M. A case of Q  
191 fever acquired in Sweden and isolation of the probable ethiological agent, *Coxiella burnetii*  
192 from an indigenous source. *Scand J Infect Dis*. 2000;32(6):605-7.
- 193 12. van der Hoek W, Morroy G, Renders NH, Wever PC, Hermans MH, Leenders AC, et  
194 al. Epidemic Q fever in humans in the Netherlands. *Adv Exp Med Biol*. 2012;984:329-64.
- 195 13. Whelan J, Schimmer B, Schneeberger P, Meekelenkamp J, Ijff A, van der Hoek W, et  
196 al. Q fever among culling workers, the Netherlands, 2009-2010. *Emerg Infect Dis*.  
197 2011;17(9):1719-23.
- 198 14. Gidding HF, Wallace C, Lawrence GL, McIntyre PB. Australia's national Q fever  
199 vaccination program. *Vaccine*. 2009;27(14):2037-41.
- 200 15. Health Council of the Netherlands. Advisory letter employees and Q fever: criteria fo  
201 vaccination [in Dutch]. 2015. Report No.: 2015/07.
